# Supplementary material
Source: Springer Nature journal article supplement (https://www.springermedizin.de/resource/supplementary/40170_2013_16_MOESM1_ESM.pdf/25787592)

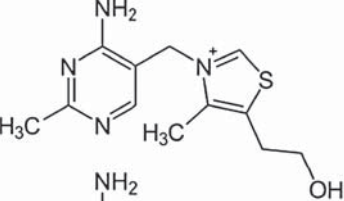

Thiamine  
Vitamin B1  
Thiamin

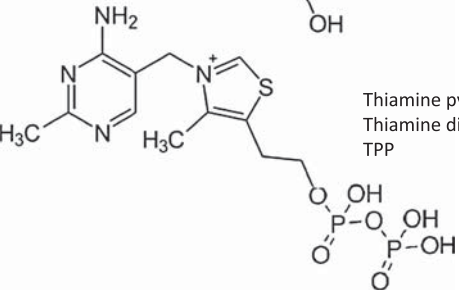

Thiamine pyrophosphate  
Thiamine diphosphate  
TPP

Supplement: MOESM1 [file 25787592]
